# Supplementary material
Source: publisher figshare collection journal article supplement (https://acs.figshare.com/ndownloader/files/20396220)
Supplement: Supplementary file 1 [file 20396220]

Compound	SMILES	MIC Eco (mg/L)	MIC Kpn (mg/L)	MIC Pae (mg/L)	MIC Pae PAO1 (mg/L)	MIC Pae PA2616 (mg/L)	?Tm Eco (°K)	?Tm Pae (°K)	logD7.4	pKa	Solubility pH 4 (µg/mL)	Solubility pH 7 (µg/mL)	Solubility pH 9 (µg/mL)	Clint
1	O=C(NO)[C@](C)(S(=O)(C)=O)CCN1C(N2C(C1)=CC(C#CC#CC3(N)CC3)=C2)=O	0.25	0.25	0.5	0.5	?0.06	10	11.6	0.7	6.5	571	418	536	17	14	<2	<10	1.8	92.2	44.7	3.49	88.9	261	29	637
2	O=C(NO)[C@](C)(S(=O)(C)=O)CCN1C(N2C(C1)=CC(C#CC#C[C@@H]3[C@@H](CO)C3)=C2)=O	0.12	0.25	0.25	0.5	?0.06			1.3		600	588	628	19	<10	3.2	<10	0.8	99.1	124	1.11	99.2	2125	17	80.8
3	O=C(NO)[C@](C)(S(=O)(C)=O)CCN1C(N2C(C1)=CC(C#CC#CC3(CO)CC3)=C2)=O	0.25	1	0.5	1	0.12			0.9		149	384	553	8.5	24			0.8	91.5	89.5	7.64
6	O=C(NO)[C@@](S(=O)(C)=O)(C)CCN1CC2=CC(C#CC#CC3(NC)CC3)=CN2C1=O	0.12	0.25	0.5	0.5	0.12	10.6	12.2	1.4	6.5	551	182	486
7	O=C(NO)[C@@](S(=O)(C)=O)(C)CCN1CC2=CC(C#CC#CC3(N(C)C)CC3)=CN2C1=O	0.25	0.5	0.5	1	0.12	11.6	13.4	2.1	5.5	412	15	95
8	O=C(NO)[C@@](S(=O)(C)=O)(C)CCN1CC2=CC(C#CC#CC3(CN)CC3)=CN2C1=O	8	16	16	16	4	9.6	10.7	-0.4	9.2	>730	552	>730
9	O=C(NO)[C@@](S(=O)(C)=O)(C)CCN1CC2=CC(C#CC#CCN3CCC(O)CC3)=CN2C1=O	1	2	1	2	0.25	9.5	11.5	0.4	6.5	>810	>810	>810
10	O=C(NO)[C@@](S(=O)(C)=O)(C)CCN1CC2=CC(C#CC#CC3CCN(C)CC3)=CN2C1=O	4	4	1	4	0.5	10.6	11.3	0.2	9	>780	>780	574
11	O=C(NO)[C@@](S(=O)(C)=O)(C)CCN1CC2=CC(C#CC#CC3(F)CCN(C)CC3)=CN2C1=O	0.5	1	1	1	0.12	9.6	12	1	8	>810	384	203
12	O=C(NO)[C@@](S(=O)(C)=O)(C)CCN1CC2=CC(C#CC#CC3CCN(C4COC4)CC3)=CN2C1=O	0.5	1	2	1	0.12	11.1	13.2	1.1	6.2	>850	329	>850
13	O=C(NO)[C@@](S(=O)(C)=O)(C)CCN1CC2=CC(C#CC#CC3CN(C)C3)=CN2C1=O	0.5	0.5	0.5	1	0.12	8.9	9.9	0.3	8.4	>730	>730	>730	8.6	665	<2	48	-0.8	63.3	52.9	19.4	81	95	18	1777
14	O=C(N)[C@@](S(=O)(C)=O)(C)CCN1CC2=CC(C#CC#CC3CN(C)C3)=CN2C1=O	>32	>32	>32	>32	>32	0	0.3	0.5	8.4	>700	706	92
15	O=C(NO)[C@@](S(=O)(C)=O)(C)CCN1CC2=CC(C#CC#CC3CNC3)=CN2C1=O	8	4	1	4	0.25	8	9.3	-1	9.4	>710	>710	>710
16	O=C(NO)[C@@](S(=O)(C)=O)(C)CCN1CC2=CC(C#CC#CC3CN(C4COC4)C3)=CN2C1=O	0.25	0.5	1	1	0.12	10.5	12.6	0.5	5.5	>800	128	681
17	O=C(NO)[C@@](S(=O)(C)=O)(C)CCN1CC2=CC(C#CC#CC3(F)CN(C)C3)=CN2C1=O	0.12	0.5	2	1	0.12	8.1	11.6	1.1	6.7	>760	219	>760
18	O=C(NO)[C@@](S(=O)(C)=O)(C)CCN1CC2=CC(C#CC#CC3(F)CNC3)=CN2C1=O	1	2	2	2	0.5	7.1	10	0.3	8	>740	175	279
19	O=C(NO)[C@@](S(=O)(C)=O)(C)CCN1CC2=CC(C#CC#CC3CN(CCF)C3)=CN2C1=O	0.06	0.25	0.5	0.25	?0.06	10.6	12.9	1	6.7	>780	247	>780	15.4	>1250	<2	<10	-0.6	93.5	49.1	3.19	93.3	567	38	291
20	O=C(NO)[C@@](S(=O)(C)=O)(C)CCN1CC2=CC(C#CC#CC3CN(CC(F)F)C3)=CN2C1=O	0.06	0.25	1	0.5	?0.06	10.6	13.2	1.4	5.2	>820	209	>820
21	O=C(NO)[C@@](S(=O)(C)=O)(C)CCN1CC2=CC(C#CC#CC3CN(CC)C3)=CN2C1=O	0.25	0.5	0.5	0.5	0.12	9.3	10.4	0.6	8.5	>750	>750	>750
22	O=C(NO)[C@@](S(=O)(C)=O)(C)CCN1CC2=CC(C#CC#CC3CN(C(C)C)C3)=CN2C1=O	0.25	0.25	0.5	0.5	?0.06	9.6	11.2	1	8.3	>780	398	420
23	O=C(NO)[C@@](S(=O)(C)=O)(C)CCN1CC2=CC(C#CC#CC3CN(CCO)C3)=CN2C1=O	0.5	1	0.5	0.5	?0.06	9.7	11.2	0.1	7.9	>780	>780	>780	7.3	198	<2	14	-0.9	66.1	63.2	21.4	69.9	93	28	1774
24	O=C(NO)[C@@](S(=O)(C)=O)(C)CCN1CC2=CC(C#CC#CC3CN(CC(C)(O)C)C3)=CN2C1=O	0.5	1	0.5	0.5	?0.06	10.3	12.1	0.7	7.8	>830	>830	>830					2.2	90	47.3	4.73
25	O=C(NO)[C@@](S(=O)(C)=O)(C)CCN1CC2=CC(C#CC#CC3CN(C(C)=O)C3)=CN2C1=O	1	1	1	1	0.12	9.7	12.4	0.3	-	>780	>780	>780
26	O=C(NO)[C@](C)(S(=O)(C)=O)CCN1C(N2C(C1)=CC(C#CC#C[C@H]3[C@H](CO)C3)=C2)=O	0.12	0.25	0.5	0.5	?0.06			1.1		600	602	552	13.4	<10
27	O=C(NO)[C@@](S(=O)(C)=O)(C)CCN1CC2=CC(C#CC#C[C@@H]3[C@@](C)(CO)C3)=CN2C1=O	0.25	0.25	0.25	0.5	?0.06			1.6		344	401	506	55	<10
28	O=C(NO)[C@@](S(=O)(C)=O)(C)CCN1CC2=CC(C#CC#C[C@@H]3[C@](CO)(F)C3)=CN2C1=O	0.25	0.5	0.5	0.5	?0.06			0.9		354	613	>760	13	16
29	O=C(NO)[C@@](S(=O)(C)=O)(C)CCN1CC2=CC(C#CC#C[C@H]3[C@@](CO)(F)C3)=CN2C1=O	0.25	0.5	0.5	0.5	?0.06			0.9		220	248	>760	13	12	<2	<10	-1.2	98.6	236	3.3	98.3	306	5.2	550
30	O=C(NO)[C@@](S(=O)(C)=O)(C)CCN1CC2=CC(C#CC#C[C@@H]3[C@@H]([C@@H](O)CO)C3)=CN2C1=O	0.5	1	1	1	0.12			0.5		>780	>780	>780	10.2	<10	<2	<10	-0.6	97.3	347	9.54	98.2	172	3.1	968
31	O=C(NO)[C@@](S(=O)(C)=O)(C)CCN1CC2=CC(C#CC#C[C@H]3[C@H]([C@H](O)CO)C3)=CN2C1=O	0.25	1	0.5	0.5	0.12			0.5		618	>780	>780	10	<10
